# Supplementary material for: A novel strategy to promote photo-oxidative and reductive abilities via the construction of a bipolar Bi2WO6/N-SrTiO3 material
Source: Royal Society of Chemistry journal article supplement (doi:10.1039/c7ra10932f), 2017-01-01
Supplement: c7ra10932f1.pdf [file c7ra10932f1.pdf]

## Supporting Information

A novel strategy to promote the photo-oxidative and reductive ability via constructing bipolar material of  $\text{Bi}_2\text{WO}_6/\text{N-SrTiO}_3$

Huayu Gu<sup>a</sup>, Guanjie Xing<sup>b</sup>, Huimin Gu<sup>a</sup>, Zhanli Chai<sup>a</sup>, Xiaojing Wang<sup>\*,a</sup>

<sup>a</sup> School of Chemistry and Chemical Engineering, Inner Mongolia University,  
Hohhot, Inner Mongolia, 010021, P. R. China

<sup>b</sup> School of chemistry, Beijing Normal University, Beijing, 100875, P. R. China

\*Corresponding author: Xiaojing Wang

E-mail address: wang\_xiao\_jing@hotmail.com

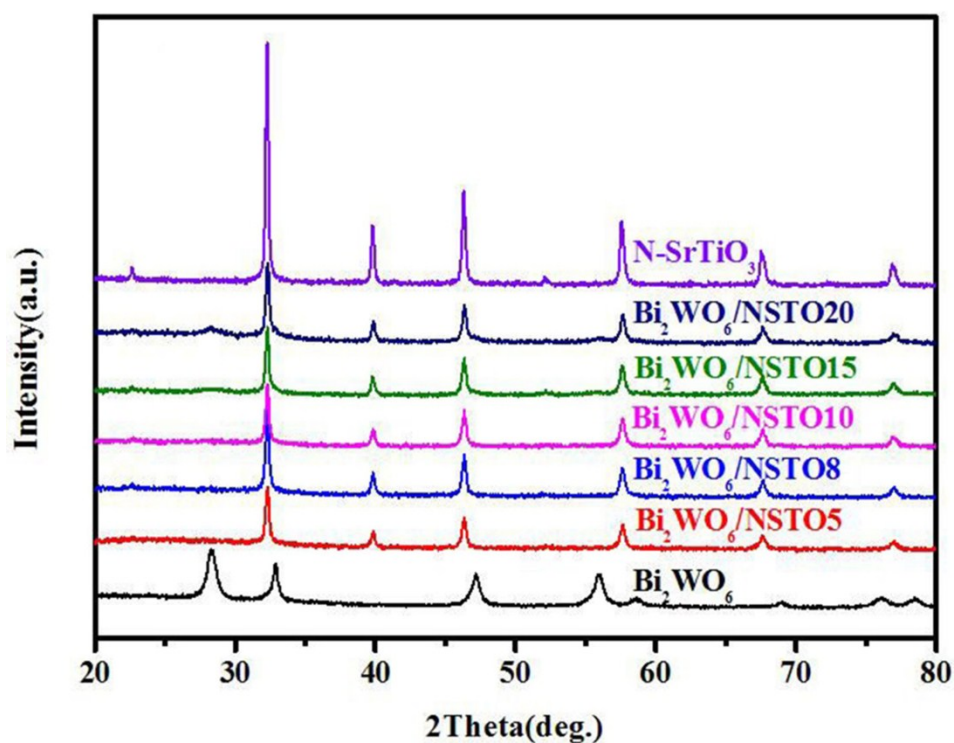

**Fig. S1** XRD patterns of the samples prepared with the various ratios of  $\text{Bi}_2\text{WO}_6/\text{N-SrTiO}_3$

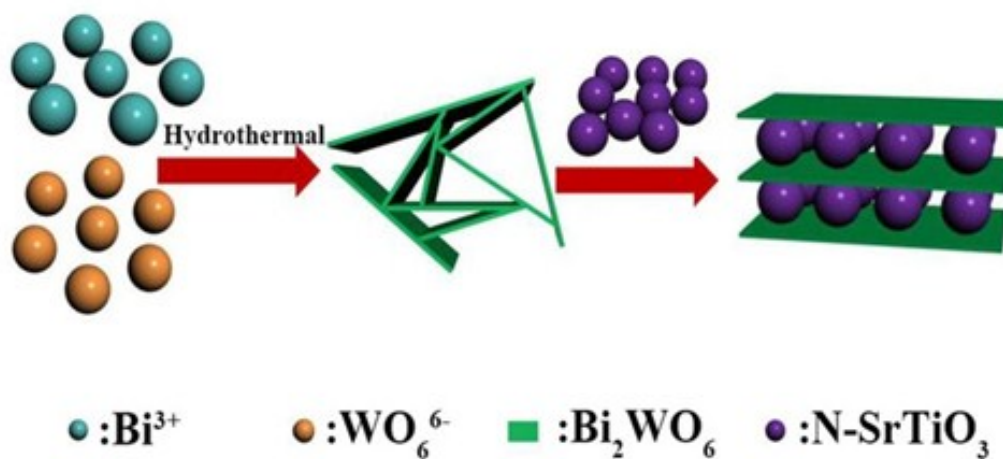

Fig. S2 The growth process of Bi<sub>2</sub>WO<sub>6</sub>/N-SrTiO<sub>3</sub>.

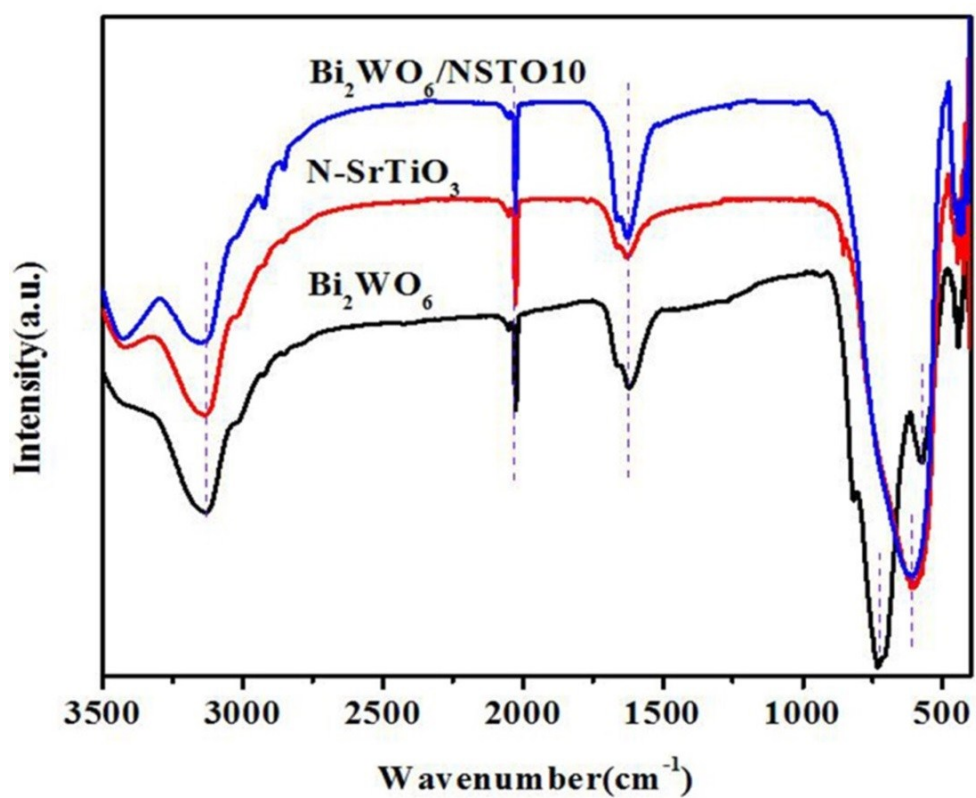

Fig. S3 FT-IR spectra of the as-prepared photocatalysts

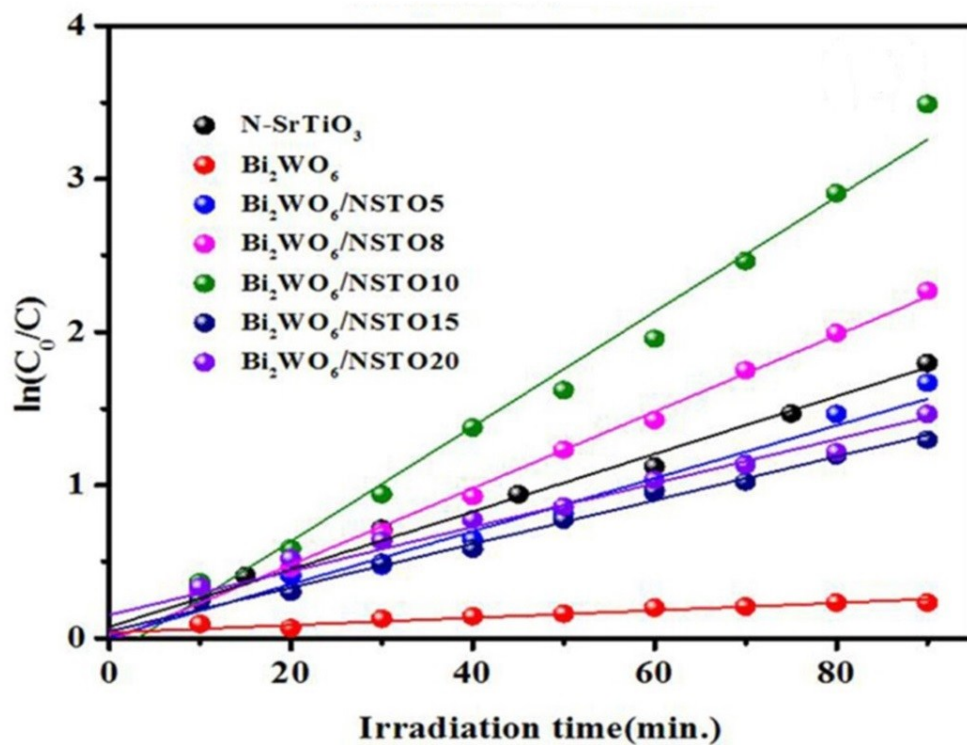

**Fig. S4** Kinetic curves of photocatalytic degradation of Cr(VI) fitted from the data of Fig. 8 in the presence of Bi<sub>2</sub>WO<sub>6</sub>, N-SrTiO<sub>3</sub> and Bi<sub>2</sub>WO<sub>6</sub>/N-SrTiO<sub>3</sub> with various ratio of W:Ti= 5%, 8%, 10%, 15%, 20%, respectively.

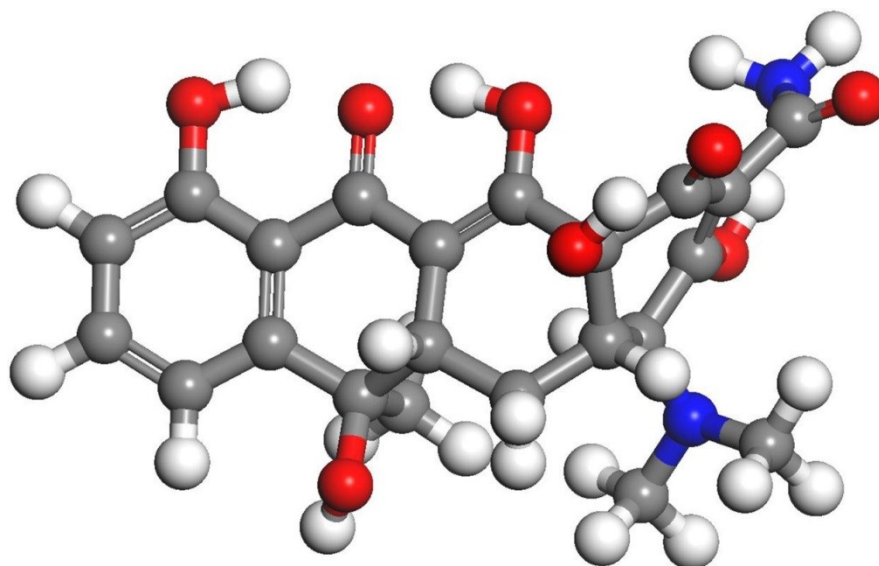

Energy of Highest Occupied Molecular Orbital -0.18927Ha -5.150eV  
 Energy of Lowest Unoccupied Molecular Orbital -0.12053Ha -3.280eV

**Fig. S5** The energy of HOMO and LUMO for TC according to the calculation results of DMol<sup>3</sup> (Materials Studio).

**Table S1** Comparison with the references for the photocatalytic reduction of Cr(VI) ions under visible light irradiation.

| Systems                                 | Catalyst dosage (mg/mL) | [Cr(VI)] (mg/L) | Time (min) | Removal efficiency (%) | Reference                         |
|-----------------------------------------|-------------------------|-----------------|------------|------------------------|-----------------------------------|
| Bi <sub>2</sub> WO <sub>6</sub> /NSTO10 | 0.3                     | 5               | 20         | 100                    | The present work                  |
| BN/BiOCl                                | 0.8                     | 10              | 150        | 91.7                   | (Xu et al., 2017) [45]            |
| TiO <sub>2</sub> -10%rGO                | 0.67                    | 10              | 180        | 98                     | (Liu et al., 2017) [44]           |
| SPNH-MOSF@SnS <sub>2</sub>              | 1                       | 50              | 90         | 99.5                   | (Qu et al., 2017) [43]            |
| ZnO/TiO <sub>2</sub>                    | 1                       | 20              | 120        | 100                    | (Naimi-Joubani et al., 2015) [42] |

**Table S2** Comparison with the references for the photocatalytic degradation of TC under visible light irradiation.

| Systems                                 | Catalyst dosage (mg/mL) | TC (mg/L) | Time (min) | Removal efficiency (%) | Reference                |
|-----------------------------------------|-------------------------|-----------|------------|------------------------|--------------------------|
| Bi <sub>2</sub> WO <sub>6</sub> /NSTO10 | 0.3                     | 20        | 20         | 100                    | The present work         |
| MGO-Ce-TiO <sub>2</sub> -10%            | 0.5                     | 25        | 80         | 83                     | (Cao et al., 2016) [46]  |
| AgBr/CSs                                | 1                       | 20        | 60         | 79.6                   | (Huo et al., 2016a) [47] |
| ZnO/CeO <sub>2</sub> @HNTs              | 0.3                     | 20        | 90         | 87                     | (Ye et al., 2016) [48]   |
